# Supplementary material for: Analysis of Post-Mining Vegetation Development Using Remote Sensing and Spatial Regression Approach: A Case Study of Former Babina Mine (Western Poland)
Source: MDPI journal article supplement (doi:10.3390/rs15030719), 2023-01-26
Supplement: s1 [file s1]

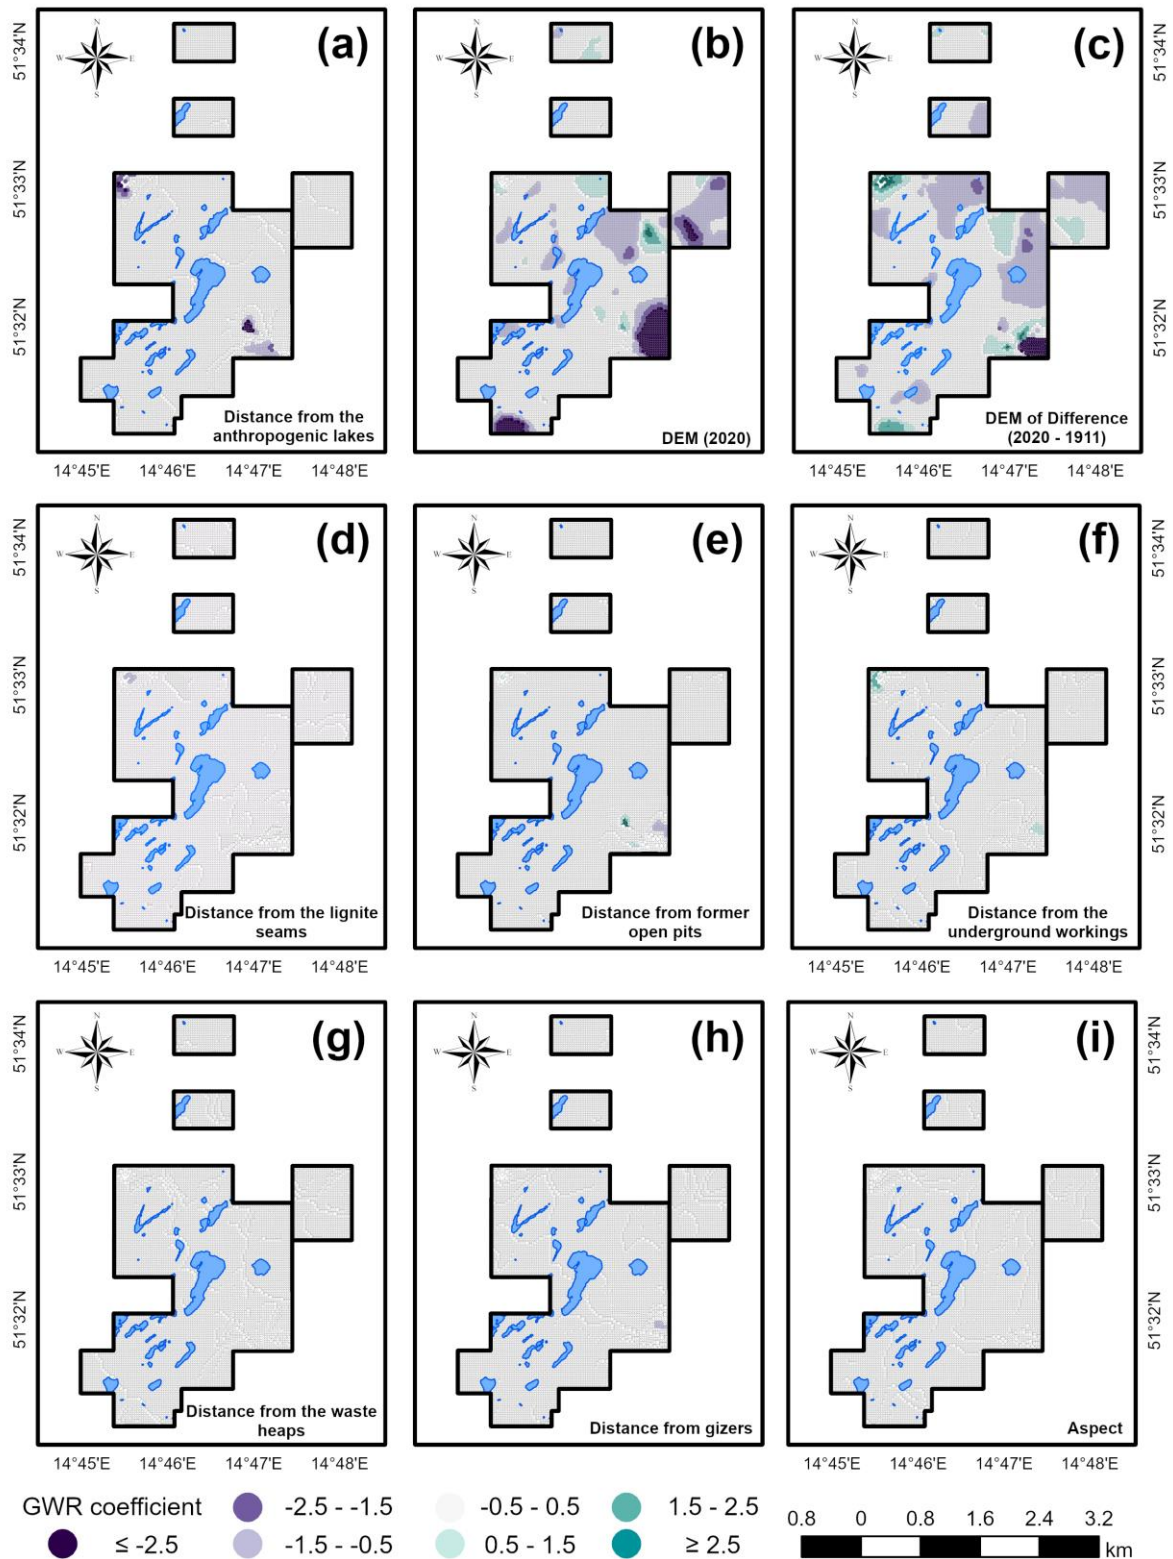

**Figure S2.** GWR coefficients in the NDVI model: (a) Distance from the anthropogenic lakes; (b) DEM (2020); (c) DEM of Difference (2020 – 1911); (d) Distance from the lignite seams; (e) Distance from former open pits; (f) Distance from the underground workings; (g) Distance from the waste heaps; (h) Distance from gizers; (i) Aspect.
