# Supplementary material for: Analysis of Post-Mining Vegetation Development Using Remote Sensing and Spatial Regression Approach: A Case Study of Former Babina Mine (Western Poland)
Source: MDPI journal article supplement (doi:10.3390/rs15030719), 2023-01-26
Supplement: s1 [file s1]

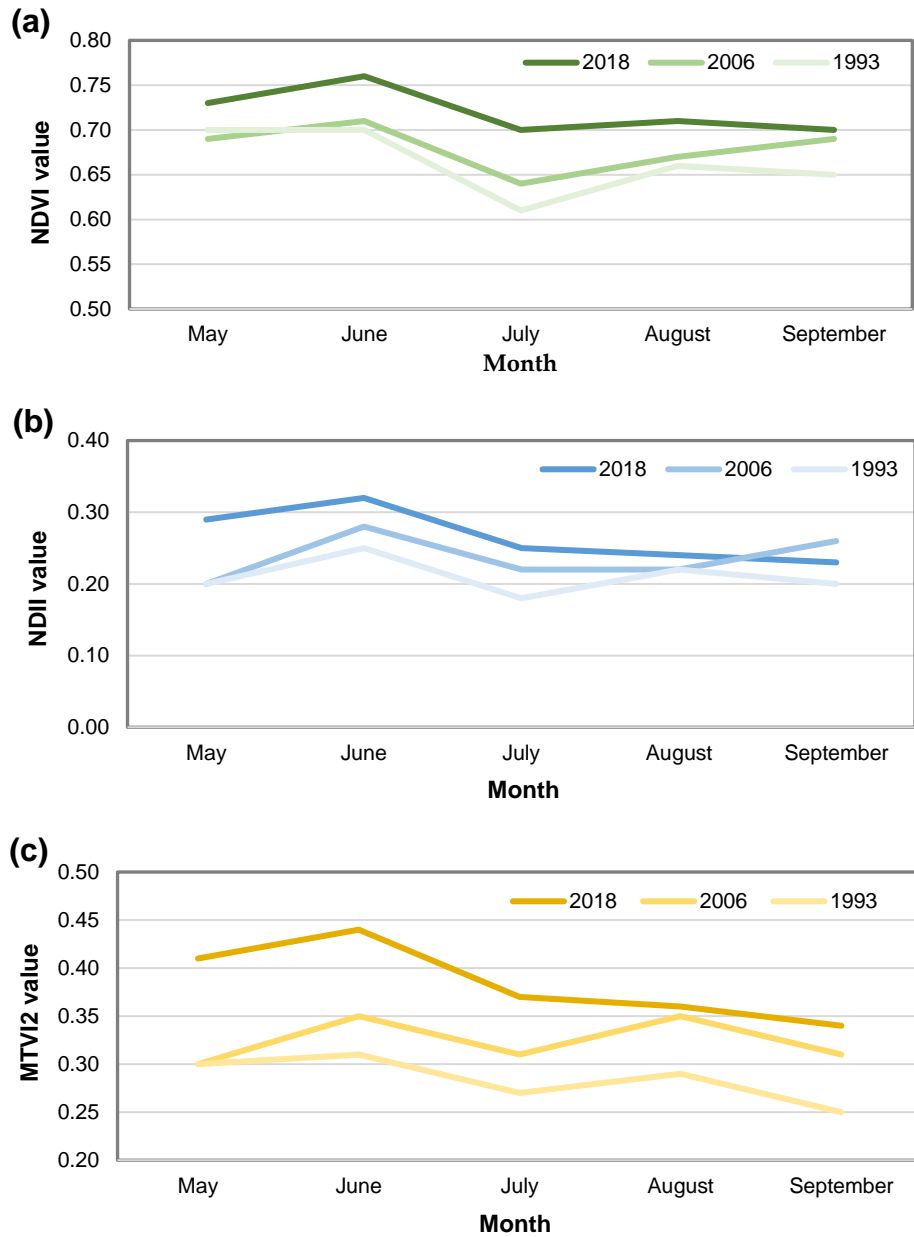

**Figure S5.** Values of vegetation indices in the period from May to September in 1993, 2006 and 2018: (a) Analysis of changes in the NDVI index values; (b) Analysis of changes in the NDII index values; (c) Analysis of changes in the MTVI2 index values.
