# Supplementary material for: Analysis of Post-Mining Vegetation Development Using Remote Sensing and Spatial Regression Approach: A Case Study of Former Babina Mine (Western Poland)
Source: MDPI journal article supplement (doi:10.3390/rs15030719), 2023-01-26
Supplement: s1 [file s1]

**Table S1.** Summary of the archival mining maps obtained from the State Mining Authority.

| No. | Map name                                                                  | Year of map development | Map section | Scale    | Spatial extent of map |              |              |              |
|-----|---------------------------------------------------------------------------|-------------------------|-------------|----------|-----------------------|--------------|--------------|--------------|
|     |                                                                           |                         |             |          | N                     | S            | E            | W            |
| 1.  | Open-pit E                                                                | 1970                    | Ia          | 1: 1 000 | 51°33'56'' N          | 51°34'12'' N | 14°46'45'' E | 14°46'4'' E  |
| 2.  | Inclined Shaft IX<br>Strata +132, +124,<br>+116, +108, +100               | 1970                    |             |          |                       |              |              |              |
| 3.  | Inclined Shaft IX<br>Strata +128, +120,<br>+112, +104, +96                | 1970                    |             |          |                       |              |              |              |
| 4.  | Open-pit D                                                                | 1967                    | Vb          | 1: 1 000 | 51°31'30'' N          | 51°31'14'' N | 14°46'4'' E  | 14°45'23'' E |
| 5.  | Coal seam                                                                 | 1957                    | VIa         | 1: 1 000 | 51°31'30'' N          | 51°31'14'' N | 14°46'45'' E | 14°46'4'' E  |
| 6.  | Open-pit Czaple II                                                        | 1957                    | Xb          | 1: 1 000 | 51°33'23'' N          | 51°33'39'' N | 14°46'4'' E  | 14°45'23'' E |
| 7.  | Inclined Shaft VIII<br>Strata +124, +118,<br>+108, +104, +85, +81,<br>+72 | 1970                    | XIa         | 1: 1 000 | 51°33'7'' N           | 51°32'51'' N | 14°46'45'' E | 14°46'4'' E  |
| 8.  | Inclined Shaft VIII<br>Strata 124-104-94-99-<br>82-85-90                  | 1958                    |             |          |                       |              |              |              |
| 9.  | Inclined Shaft VIII<br>Strata 128-108                                     | 1958                    |             |          |                       |              |              |              |
| 10. | Inclined Shaft VIII<br>Strata 136-116                                     | 1958                    |             |          |                       |              |              |              |
| 11. | Open-pit B                                                                | 1965                    | XIc         | 1: 1 000 | 51°32'51'' N          | 51°32'35'' N | 14°46'45'' E | 14°46'4'' E  |
| 12. | Coal seam 1<br>Field B                                                    | 1957                    |             |          |                       |              |              |              |
| 13. | Coal seam                                                                 | 1957                    |             |          |                       |              |              |              |
| 14. | Coal seam                                                                 | 1957                    | XIIa        | 1: 1 000 | 51°33'7'' N           | 51°32'51'' N | 14°48'8'' E  | 14°47'27'' E |
| 15. | Coal seam                                                                 | 1957                    | XIIc        | 1: 1 000 | 51°32'51'' N          | 51°32'35'' N | 14°48'8'' E  | 14°47'27'' E |
| 16. | Inclined Shaft VIII<br>Strata +131, +104                                  | 1969                    | XVb         | 1: 1 000 | 51°33'7'' N           | 51°32'51'' N | 14°46'4'' E  | 14°45'23'' E |
| 17. | Inclined Shaft VIII<br>Strata +126, +99,<br>+113, +85                     | 1969                    |             |          |                       |              |              |              |
| 18. | Inclined Shaft VIII<br>Strata +86, +72, +64,<br>+81, +108, +57            | 1970                    |             |          |                       |              |              |              |
| 19. | Inclined Shaft VIII<br>Strata +122, +96                                   | 1970                    |             |          |                       |              |              |              |
| 20. | Inclined Shaft VIII<br>Strata +108                                        | 1970                    |             |          |                       |              |              |              |
| 21. | Inclined Shaft VIII<br>Strata +104                                        | 1970                    |             |          |                       |              |              |              |
| 22. | Inclined Shaft VIII<br>Strata +99                                         | 1970                    |             |          |                       |              |              |              |
| 23. | Inclined Shaft VIII<br>Strata +95                                         | 1970                    |             |          |                       |              |              |              |
| 24. | Inclined Shaft VIII<br>Strata +108, +136                                  | 1969                    |             |          |                       |              |              |              |
| 25. | Inclined Shaft VIII<br>Strata +126, +95                                   | 1966                    |             |          |                       |              |              |              |
| 26. | Inclined Shaft VIII                                                       | 1962                    |             |          |                       |              |              |              |

| No. | Map name                                                                                         | Year of map development | Map section | Scale    | Spatial extent of map |             |             |             |
|-----|--------------------------------------------------------------------------------------------------|-------------------------|-------------|----------|-----------------------|-------------|-------------|-------------|
|     |                                                                                                  |                         |             |          | N                     | S           | E           | W           |
| 27. | Inclined Shaft VIII<br>Strata +86, +82, +77,<br>+72, +64, +90, +95,<br>+100, +104, +108,<br>+124 | 1970                    |             |          |                       |             |             |             |
| 28. | Inclined Shaft VIII<br>Strata +95                                                                | 1970                    |             |          |                       |             |             |             |
| 29. | Open-pit B                                                                                       | 1965                    |             |          |                       |             |             |             |
| 30. | Inclined Shaft<br>Va-VII<br>Strata 102-107-132-<br>80-76                                         | 1956                    |             |          |                       |             |             |             |
| 31. | Inclined Shaft<br>Va-VII<br>Strata 122-127-98-94<br>Field B                                      | 1958                    | XVd         | 1: 1 000 | 51°32'51" N           | 51°32'35" N | 14°46'4" E  | 14°45'23" E |
| 32. | Inclined Shaft VIII<br>Strata 136-116-135-<br>108-106                                            | 1958                    |             |          |                       |             |             |             |
| 33. | Inclined Shaft<br>Va-VII<br>Strata 112-117-84-88<br>Field B                                      | 1958                    |             |          |                       |             |             |             |
| 34. | Inclined Shaft VIII<br>Strata 124-104-122-95                                                     | 1958                    |             |          |                       |             |             |             |
| 35. | Open-pit D                                                                                       | 1967                    |             |          |                       |             |             |             |
| 36. | Open-pit B                                                                                       | 1965                    |             |          |                       |             |             |             |
| 37. | Inclined Shaft<br>IIc – Va<br>Open-pit C<br>Coal Strata I<br>Scale III - V                       | 1956                    | XVIa        | 1: 1 000 | 51°32'35" N           | 51°32'19" N | 14°46'45" E | 14°46'4" E  |
| 38. | Inclined Shaft<br>II – V – Va<br>Open-pit C<br>Overburden Strata<br>III<br>Scale III - V         | 1956                    |             |          |                       |             |             |             |
| 39. | Open-pit D                                                                                       | 1967                    |             |          |                       |             |             |             |
| 40. | Open-pit D                                                                                       | 1970                    | XVIb        | 1: 1 000 | 51°32'35" N           | 51°32'19" N | 14°47'27" E | 14°46'45" E |
| 41. | -                                                                                                | 1957                    |             |          |                       |             |             |             |
| 42. | Open-pit D                                                                                       | 1967                    |             |          |                       |             |             |             |
| 43. | Strata II                                                                                        | 1969                    |             |          |                       |             |             |             |
| 44. | Inclined Shaft<br>II – IIc – III<br>Open-pit C<br>Overburden Strata I<br>Scale III - V           | 1957                    | XVIc        | 1: 1 000 | 51°32'19" N           | 51°32'3" N  | 14°46'45" E | 14°46'4" E  |
| 45. | Open-pit D                                                                                       | 1967                    |             |          |                       |             |             |             |
| 46. | Strata II                                                                                        | 1970                    | XVIId       | 1: 1 000 | 51°32'19" N           | 51°32'3" N  | 14°47'27" E | 14°46'45" E |
| 47. |                                                                                                  | 1969                    |             |          |                       |             |             |             |

| No. | Map name                              | Year of map development | Map section | Scale    | Spatial extent of map |             |             |             |
|-----|---------------------------------------|-------------------------|-------------|----------|-----------------------|-------------|-------------|-------------|
|     |                                       |                         |             |          | N                     | S           | E           | W           |
| 48. | Coal seam Field B                     | 1957                    |             |          |                       |             |             |             |
| 49. | Inclined Shaft I – II – VII           | 1956                    | XXb         | 1: 1 000 | 51°32'35" N           | 51°32'19" N | 14°46'4" E  | 14°45'23" E |
| 50. | Inclined Shaft IV – Va – VII          | 1956                    |             |          |                       |             |             |             |
| 51. | Open-pit D                            | 1967                    |             |          |                       |             |             |             |
| 52. | Open-pit C, D                         | 1970                    |             |          |                       |             |             |             |
| 53. | Scale V – VI                          | 1973                    | XXIa        | 1: 1 000 | 51°32'3' N            | 51°31'46" N | 14°46'45" E | 14°46'4" E  |
| 54. | Open-pit D Strata II                  | 1969                    |             |          |                       |             |             |             |
| 55. | Open-pit E                            | 1970                    | XXIb        | 1: 1 000 | 51°32'3' N            | 51°31'46" N | 14°47'27" E | 14°46'45" E |
| 56. | Open-pit D                            | 1967                    | XXIc        | 1: 1 000 | 51°31'46" N           | 51°31'30" N | 14°46'45" E | 14°46'4" E  |
| 57. | Open-pit D                            | 1967                    |             |          |                       |             |             |             |
| 58. | Strata II                             | 1968                    | XXVb        | 1: 1 000 | 51°32'3' N            | 51°31'46" N | 14°46'4" E  | 14°45'23" E |
| 59. | Open-pit C                            | 1697                    | XXVc        | 1: 1 000 | 51°32'3' N            | 51°31'46" N | 14°46'4" E  | 14°46'4" E  |
| 60. | Open-pit D                            | June 1967               |             |          |                       |             |             |             |
| 61. | Strata II                             | November 1967           | XXVd        | 1: 1 000 | 51°31'46" N           | 51°31'30" N | 14°46'4" E  | 14°45'23" E |
| 62. | Open-pit E                            | 1972                    |             |          | 51°32'9" N            | 51°31'53" N | 14°46'50" E | 14°46'9" E  |
| 63. | Strata II                             | 1972                    |             |          | 51°31'53" N           | 51°31'37" N | 14°46'30" E | 14°45'48" E |
| 64. | Inclined Shaft 1E                     | 1971                    | n/a         | 1: 1 000 | 51°32'9" N            | 51°31'53" N | 14°46'50" E | 14°46'9" E  |
| 65. | Inclined Shaft 2E                     | 1972                    |             |          | 51°31'53" N           | 51°31'37" N | 14°46'30" E | 14°45'48" E |
| 66. | Inclined Shaft 3E                     | 1973                    |             |          | 51°31'37" N           | 51°31'20" N | 14°46'9" E  | 14°45'28" E |
| 67. | Map sections of the mining excavation |                         |             |          | n/a                   |             |             |             |
