# Supplementary material for: Analysis of Post-Mining Vegetation Development Using Remote Sensing and Spatial Regression Approach: A Case Study of Former Babina Mine (Western Poland)
Source: MDPI journal article supplement (doi:10.3390/rs15030719), 2023-01-26
Supplement: s1 [file s1]

**Table S2.** Summary of the developed independent variables.

| No. | Variable name                                                      | Figure | Data source                                                                                                                  | Method of development                                                                                                                                                                                                                                                                                                                            | Variable values [unit]       |
|-----|--------------------------------------------------------------------|--------|------------------------------------------------------------------------------------------------------------------------------|--------------------------------------------------------------------------------------------------------------------------------------------------------------------------------------------------------------------------------------------------------------------------------------------------------------------------------------------------|------------------------------|
| 1.  | Distance from former open pits                                     | 6a     | The shapefile presenting the extent of opencast mining excavations, obtained from the Polish Geological Institute            | Development of a raster presenting Euclidean distances from the opencast mining excavations in the research area                                                                                                                                                                                                                                 | 0 – 1106.4 [m]               |
| 2.  | Distance from the underground workings                             | 6b     | The set of 67 scanned maps of mining excavations from 1956 to 1973, in scale 1:000, obtained from the State Mining Authority | Development of a raster presenting Euclidean distances from the underground mining excavations in the research area                                                                                                                                                                                                                              | 0 – 882.3 [m]                |
| 3.  | Distance from the mining waste heaps                               | 6c     | The shapefile presenting the location of the mining dumps, obtained from the Polish Geological Institute                     | Development of a raster presenting Euclidean distances from the mining waste heaps in the research area                                                                                                                                                                                                                                          | 0 – 1755.7 [m]               |
| 4.  | Number of shafts per reference unit area                           | 6d     | The set of 67 scanned maps of mining excavations from 1956 to 1973, in scale 1:000, obtained from the State Mining Authority | Development of a raster based on the mining shafts layer, digitalised from the source material ( <i>Point to Raster</i> tool was used. <i>Sum of objects</i> was selected during specification of values of raster cells)                                                                                                                        | 0 – 17 [-]                   |
| 5.  | Average depth of the mining shafts                                 | 6e     | The set of 67 scanned maps of mining excavations from 1956 to 1973, in scale 1:000, obtained from the State Mining Authority | Development of a raster based on the mining shafts layer, digitalised from the source material ( <i>Point to Raster</i> tool was used. <i>Average option</i> was selected during specification of raster cell values for the <i>Level field</i> ). The created raster was subtracted from the DEM from 2020 (variable no. 14)                    | 0 – 164.2 [m]                |
| 6.  | Average depth of the underground excavations                       | 6f     | The set of 67 scanned maps of mining excavations from 1956 to 1973, in scale 1:000, obtained from the State Mining Authority | Development of a raster based on the underground mining excavations layer, digitalised from the source material ( <i>Polygon to Raster</i> tool was used. <i>Average option</i> was selected during specification of raster cell values for the <i>Level field</i> ). The created raster was subtracted from the DEM from 2020 (variable no. 14) | 0 – 113.2 [m]                |
| 7.  | Minimum depth of the underground excavations                       | 6g     | The set of 67 scanned maps of mining excavations from 1956 to 1973, in scale 1:000, obtained from the State Mining Authority | Development of a raster based on the underground mining excavations layer, digitalised from the source material ( <i>Polygon to Raster</i> tool was used. <i>Minimum option</i> was selected during specification of raster cell values for the <i>Level field</i> ). The created raster was subtracted from the DEM from 2020 (variable no. 14) | 0 – 113.2 [m]                |
| 8.  | Area of the underground mining excavations per reference unit area | 6h     | The set of 67 scanned maps of mining excavations from 1956 to 1973, in scale 1:000, obtained from the State Mining Authority | Development of a raster based on the underground mining excavations layer digitalised from the source material ( <i>Polygon to Raster</i> tool was used. <i>Sum option</i> was selected during specification of raster cell values for the <i>Area field</i> )                                                                                   | 0 – 5164.8 [m <sup>2</sup> ] |

MINING FACTORS



|                     | No. | Variable name                                         | Figure | Data source                                                                                                                                            | Method of development                                                                                                                           | Variable values [unit]   |
|---------------------|-----|-------------------------------------------------------|--------|--------------------------------------------------------------------------------------------------------------------------------------------------------|-------------------------------------------------------------------------------------------------------------------------------------------------|--------------------------|
| GEOLOGICAL FACTORS  | 9.  | Distance from the lignite seams                       | 7a     | The shapefile presenting the boundaries of mineral deposits in Poland, available in Polish Geological Institute database                               | Development of a raster presenting Euclidean distances from the lignite seams in the research area                                              | 0 – 865.8 [m]            |
|                     | 10. | Groundwater table elevation                           | 7b     | Hydrogeological Map of Poland from 2006 and drawn at scale 1:50000                                                                                     | Development of raster as the difference between DEM from 2020 (variable no. 14) and aquifer's depth layer, digitalised from the source material | 102.3 – 163.1 [m a.s.l.] |
|                     | 11. | Distance from gizers                                  | 7c     | The shapefile presenting documented locations of gizers in the research area, obtained from the Polish Geological Institute                            | Development of a raster presenting Euclidean distances from the gizers in the research area                                                     | 0 – 1382.9 [m]           |
|                     | 12. | Distance from the boundary of glaciotectionic changes | 7d     | The shapefile presenting extent of the glaciotectionic structures, obtained from the Polish Geological Institute                                       | Development of a raster presenting Euclidean distances from the gizers in the research area                                                     | 0 – 807.8 [m]            |
| TOPOGRAPHIC FACTORS | 13. | DEM (as in year 1911)                                 | 8a     | German Topographical Map – Messtischblatt from 1911 drawn at the scale 1:25000                                                                         | Development of DEM based on the contour and point elevation layers, digitalised from the source material                                        | 105.0 – 181.9 [m a.s.l.] |
|                     | 14. | DEM (as in year 2020)                                 | 8b     | Set of points with XYZ coordinates obtained from aerial laser scanning performed in 2020, available from the Central Office of Geodesy and Cartography | Development of DEM based on acquired point cloud                                                                                                | 106.3 – 181.2 [m a.s.l.] |
|                     | 15. | DEM of Difference (2020 – 1911)                       | 8c     | Variables no. 13 and 14                                                                                                                                | Difference between DEMs from years 2020 and 1911, respectively                                                                                  | -19.6 – 10.7 [m]         |
|                     | 16. | Distance from the anthropogenic lakes                 | 8d     | Vector data from Database of Topographical Objects (scale 1:10000), available from the Central Office of Geodesy and Cartography                       | Development of a raster presenting Euclidean distances from the anthropogenic lakes in the research area                                        | 0 – 1158.0 [m]           |
|                     | 17. | Slope of the terrain                                  | 8e     | Set of points with XYZ coordinates obtained from aerial laser scanning performed in 2020, available from the Central Office of Geodesy and Cartography | Slope of the terrain was determined based on DEM (as in year 2020)                                                                              | 0 – 23.0 [°]             |
|                     | 18. | Aspect of the terrain                                 | 8f     | Set of points with XYZ coordinates obtained from aerial laser scanning performed in 2020, available from the Central Office of Geodesy and Cartography | Aspect of the terrain was determined based on DEM (as in year 2020)                                                                             | 0 – 360 [°]*             |

\* The value of 0° means North. The increase in the value of the angle, and hence the change of direction, occurs clockwise.
