# Supplementary figures and images for: Analysis of Post-Mining Vegetation Development Using Remote Sensing and Spatial Regression Approach: A Case Study of Former Babina Mine (Western Poland)
Source: MDPI journal article supplement (doi:10.3390/rs15030719), 2023-01-26

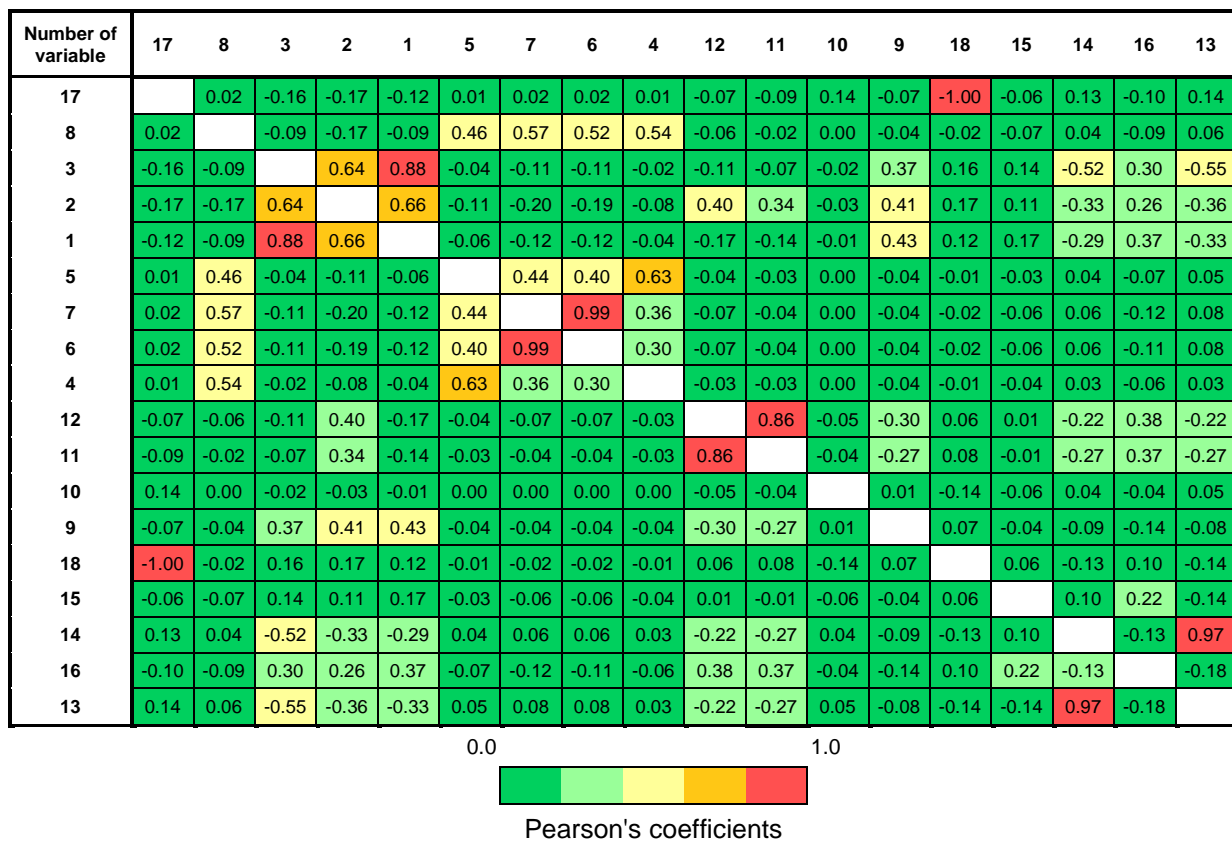

**Figure S1.** Correlation matrix of independent variables.

Supplement: s1 [file s1]
